# Supplementary material for: Impact of meteorology and aerosol sources on PM 2.5 and oxidative potential variability and levels in China
Source: Copernicus journal article supplement (doi:10.5194/acp-24-10849-2024), 2024-09-26
Supplement: Supplementary file 1 [file acp-24-10849-2024-supplement.pdf]

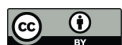

*Supplement of*

## **Impact of meteorology and aerosol sources on PM<sub>2.5</sub> and oxidative potential variability and levels in China**

**Jiemei Liu et al.**

*Correspondence to:* Yuan Yuan (yuanyuan83@hit.edu.cn) and Ulas Im (ulas@envs.au.dk)

The copyright of individual parts of the supplement might differ from the article licence.

**Captions of Supplementary Figures**

- 20 Figure S1. Density scatterplots of model performance and validation based on monthly mean  $PM_{2.5}$  observations for China in 2014 under scenario  $C_1$ .
- Figure S2. Density scatterplots of model performance and validation in scenario  $C_2$  and  $C_3$  for China in 2014.

25

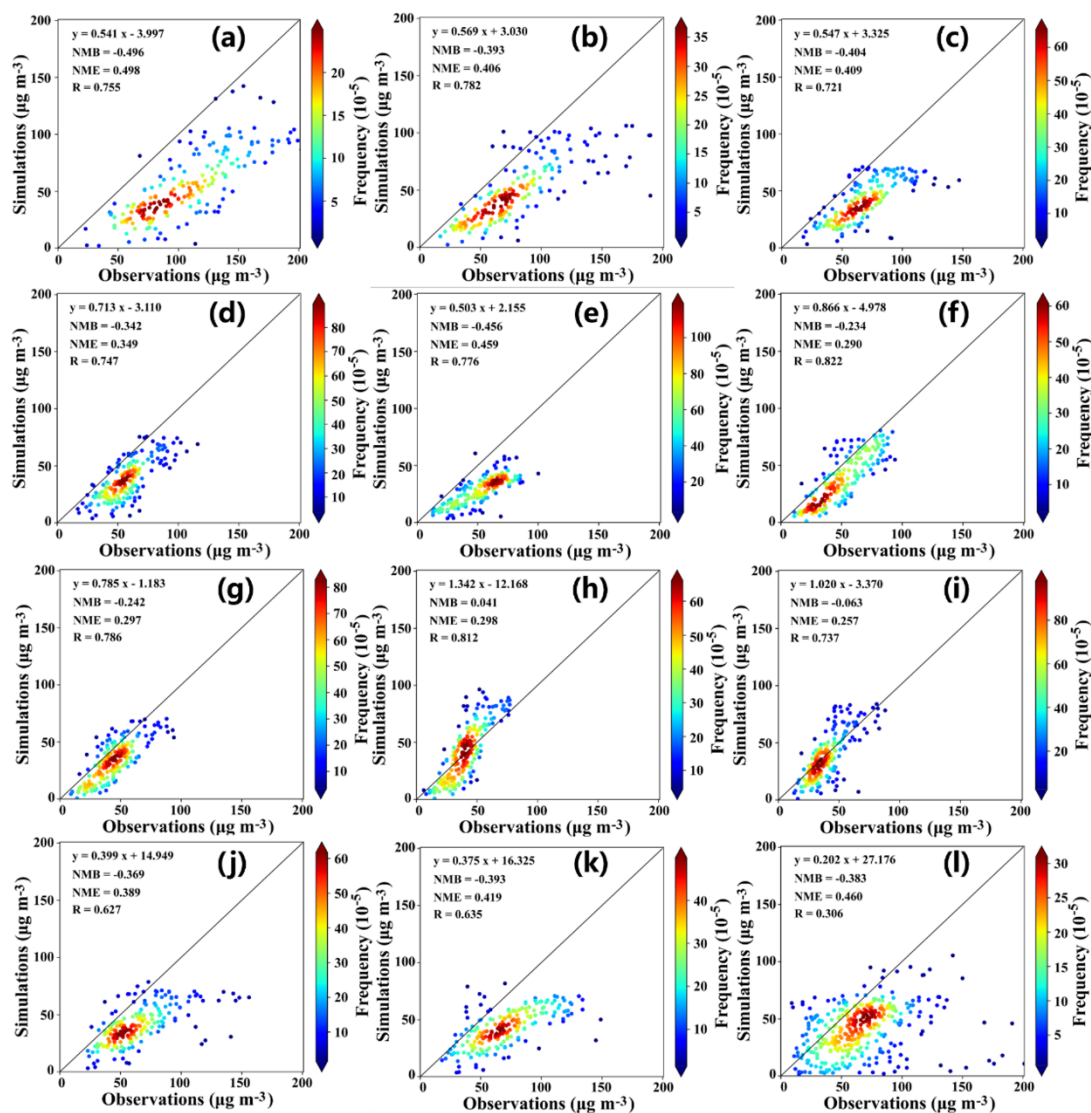

Figure S1. Density scatterplots of model performance and validation based on monthly mean  $\text{PM}_{2.5}$  observations for China in 2014 under scenario  $C_1$ ; (a) to (l) are the results from January to December.

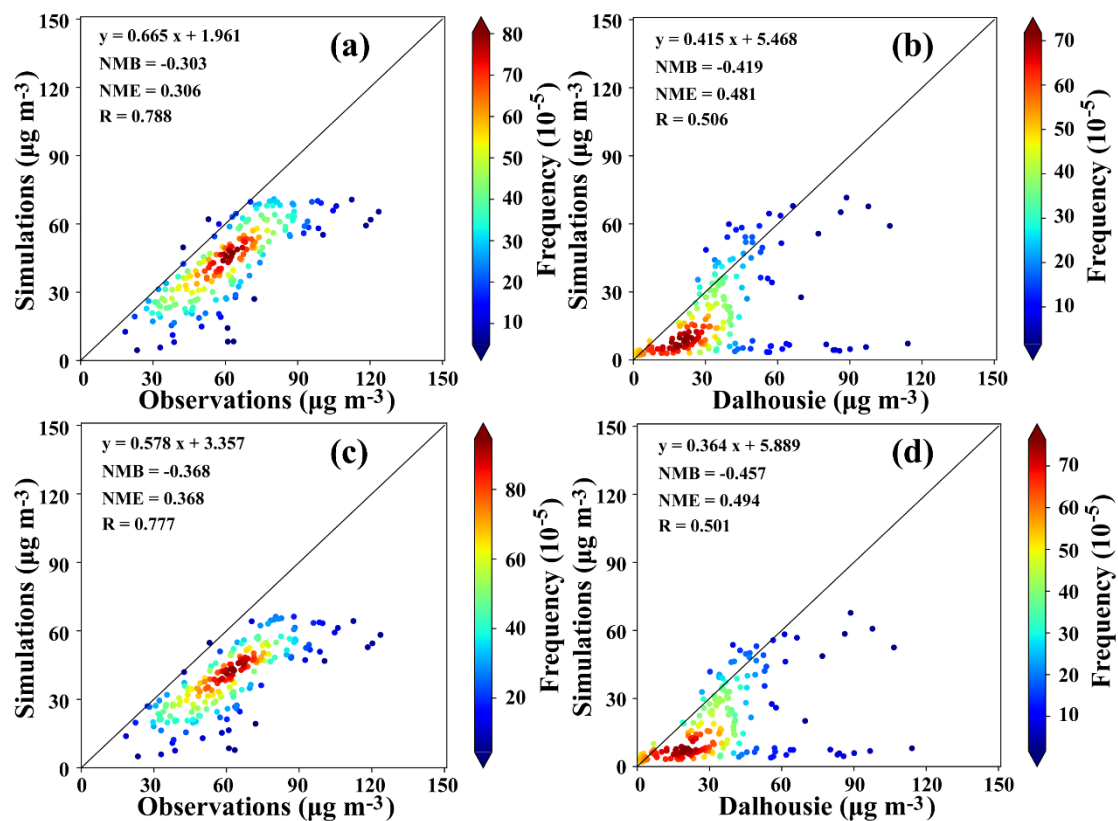

Figure S2. Density scatterplots of model performance and validation in scenario C<sub>2</sub> and C<sub>3</sub> for China in

2014; (a) and (b) represent the results in scenario C<sub>2</sub> based on annual mean PM<sub>2.5</sub> observations and annual

35 mean PM<sub>2.5</sub> derived from the Dalhousie dataset, respectively; (c) and (d) represent the results in scenario C<sub>3</sub>

based on annual mean PM<sub>2.5</sub> observations and annual mean PM<sub>2.5</sub> derived from the Dalhousie dataset,

respectively.
